# Supplementary material for: Optimization of Saliva Collection and Immunochromatographic Detection of Salivary Pepsin for Point-of-Care Testing of Laryngopharyngeal Reflux
Source: PubMed Central journal article supplement (PMC6982828; doi:10.3390/s20010325), 2020-01-06
Supplement: sensors-20-00325-s001.pdf [file sensors-20-00325-s001.pdf]

## Supporting Information

*Article*

# Optimization of Saliva Collection and Immunochromatographic Detection of Salivary Pepsin for Point-of-Care Testing of Laryngopharyngeal Reflux

Young Ju Lee <sup>1</sup>, Jiyeon Kwon <sup>2</sup>, Sanggyeong Shin <sup>2</sup>, Young-Gyu Eun <sup>3</sup>, Jae Ho Shin <sup>2\*</sup> and Gi-Ja Lee <sup>1,\*</sup>

<sup>1</sup> Dept. of Biomedical Engineering, College of Medicine, Kyung Hee University, Seoul 02447, Korea; younglee@khu.ac.kr

<sup>2</sup> Dept. of Chemistry, College of Natural Science, Kwangwoon University, Seoul 01897, Korea; jykwon@i-sens.com (J.K); ssg0323@nanoentek.com (S.S)

<sup>3</sup> Dept. of Otolaryngology–Head and Neck Surgery, Kyung Hee University Medical Center, Seoul 02447, Korea; ygeun@khu.ac.kr

\* Correspondence: jhshin@kw.ac.kr (J.S); gjlee@khu.ac.kr (G.L)

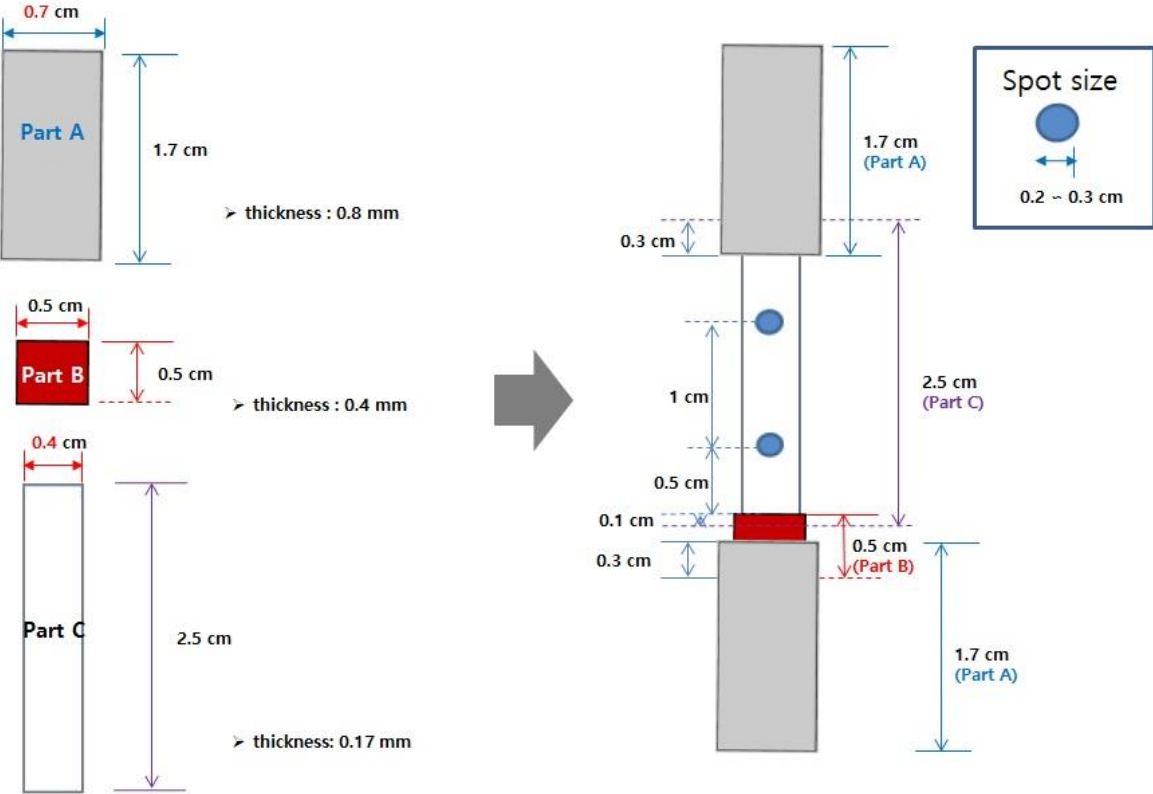

Figure 1. Schematic of immunochromatographic pepsin strip.
